# Supplementary material for: Horizontal Plasmid Transfer Promotes the Dissemination of Asian Acute Hepatopancreatic Necrosis Disease and Provides a Novel Mechanism for Genetic Exchange and Environmental Adaptation
Source: PubMed Central journal article supplement (PMC7380584; doi:10.1128/msystems.00799-19), 2020-03-17
Supplement: mSystems.00799-19-sf002.pdf [file mSystems.00799-19-sf002.pdf]

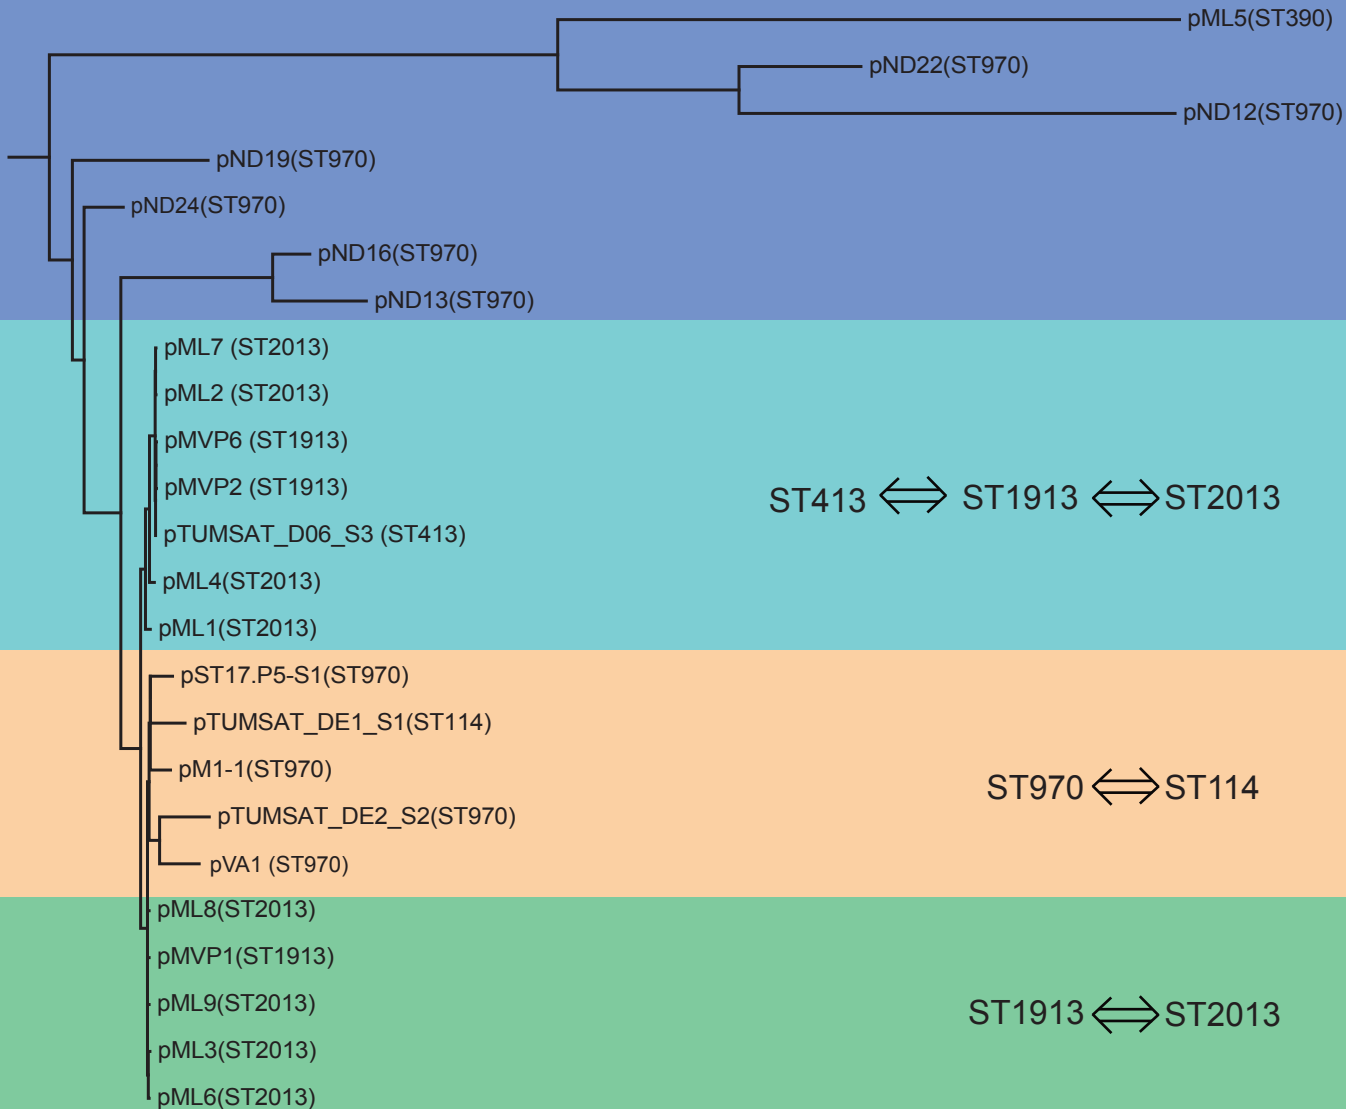

0.1
